# Supplementary material
Source: publisher site journal article supplement (https://www.dovepress.com/article/382620)
Supplement: Supplementary file 1 [file get_supplementary_file.php]

| Protein Full Name                                              | Abbreviation  | Literature Inflammatory Categorization* | n available | % missing | Median (pg/ml) | 25 %ile (pg/ml) | 75th %ile (pg/ml) | Inter-CV, % QC1/QC2 | Intra-CV, % QC1/QC2 |
|----------------------------------------------------------------|---------------|-----------------------------------------|-------------|-----------|----------------|-----------------|-------------------|---------------------|---------------------|
| Alpha-1-microglobulin                                          | A1M           |                                         | 7277        | 1         | 11100000       | 8800000         | 14200000          | 7.9/7.3             | 3.9/3.9             |
| Disintegrin and metalloproteinase domain-containing protein 15 | ADAM15        |                                         | 7290        | 1         | 333            | 181             | 654               | 3.3/3.0             | 8.3/3.9             |
| Adipsin                                                        | Adipsin       |                                         | 7285        | 1         | 863000         | 724000          | 1050000           | 16.3/19.0           | 5.1/4.3             |
| Adrenomedullin                                                 | ADM           | Yes                                     | 7312        | 1         | 297            | 252             | 352               | 10.9/6.3            | 5.0/6.3             |
| Alpha-1 acid glycoprotein                                      | AGP1          | Yes                                     | 7334        | 0         | 670000000      | 555000000       | 805000000         | 4.6/5.7             | 8.1/8.3             |
| Angiotensin-like 3                                             | ANGPTL3       |                                         | 7318        | 0         | 23000          | 16800           | 30300             | 4.0/4.8             | 17.6/12.0           |
| Apolipoprotein A-1                                             | APOA1         | Yes                                     | 7328        | 0         | 596000000      | 488000000       | 724000000         | 7.1/7.3             | 28.9/11.8           |
| Apolipoprotein B                                               | APOB          |                                         | 7265        | 1         | 684000000      | 569000000       | 823000000         | 13.4/13.4           | 3.0/6.6             |
| Beta-2-microglobulin                                           | B2M           |                                         | 7282        | 1         | 1450000        | 1240000         | 1710000           | 17.7/14.0           | 3.7/4.2             |
| Butyrylcholinesterase                                          | BCHE          |                                         | 7316        | 1         | 5990000        | 4990000         | 7140000           | 14.9/8.9            | 8.6/8.4             |
| AMBIP-bikunin (BIKUNIN)                                        | BIKUNIN       |                                         | 7308        | 1         | 178000000      | 156000000       | 207000000         | 6.3/9.8             | 2.9/7.1             |
| N-terminal prohormone of brain natriuretic peptide             | NTproBNP      |                                         | 7265        | 1         | 128            | 67.5            | 260               | 4.4/7.2             | 13.3/10.3           |
| Complement C2                                                  | C2            |                                         | 7269        | 1         | 443000000      | 400000000       | 491000000         | 16.1/11.9           | 3.2/3.9             |
| Monocyte differentiation antigen CD14                          | CD14          | Yes                                     | 7267        | 1         | 15400000       | 13500000        | 17800000          | 15.4/14.5           | 3.5/3.6             |
| Cluster of differentiation 163                                 | CD163         | Yes                                     | 7330        | 0         | 103000         | 72400           | 142000            | 3.4/4.3             | 8.5/4.8             |
| Soluble CD40 ligand                                            | CD40L         | Yes                                     | 6348        | 14        | 36.8           | 25.4            | 55.7              | 3.1/4.9             | 14.8/14.1           |
| CD5 antigen-like                                               | CD5L          | Yes                                     | 7339        | 0         | 208000         | 162000          | 266000            | 12.3/5.7            | 3.0/2.4             |
| Cadherin 13                                                    | CDH13         |                                         | 7271        | 1         | 52100          | 25400           | 127000            | 2.7/4.7             | 9.3/5.2             |
| Ceruloplasmin                                                  | Ceruloplasmin |                                         | 7340        | 0         | 1270000000     | 1080000000      | 1535000000        | 5.0/3.5             | 9.4/5.4             |
| Tetranectin                                                    | CLEC3B        |                                         | 7334        | 0         | 4540000        | 4040000         | 5040000           | 5.4/2.8             | 8.5/5.8             |
| Clusterin**                                                    | Clusterin     | Yes                                     | 7327        | 0         | 51100000       | 43800000        | 63600000          | 16.5/12.6           | 11.2/9.1            |
| Contactin 1                                                    | CNTN1         |                                         | 7328        | 0         | 46300          | 39700           | 54300             | 6.1/5.3             | 7.8/7.6             |
| Collagen, type XVIII, alpha 1                                  | COL18A1       |                                         | 7297        | 1         | 134000         | 112000          | 158000            | 3.0/5.9             | 17.1/12.9           |
| C-Reactive Protein                                             | CRP           | Yes                                     | 7284        | 1         | 848000         | 353000          | 2170000           | 14.5/9.9            | 5.1/8.2             |
| Chemokine (C-X-C motif) ligand 16                              | CXCL16        |                                         | 7321        | 0         | 1090           | 933             | 1280              | 2.8/3.5             | 13.5/11.1           |
| Cystatin-C                                                     | Cystatin C    |                                         | 7317        | 1         | 537000         | 478000          | 612000            | 9.8/5.1             | 3.2/3.1             |
| Dipeptidyl dipeptidase                                         | DPP4          |                                         | 7328        | 0         | 54000          | 41400           | 69300             | 2.5/2.3             | 7.8/3.4             |
| EGF containing fibulin-like extracellular matrix protein 1     | EFEMP1        |                                         | 7328        | 0         | 48500000       | 40100000        | 59800000          | 9.7/9.1             | 4.8/3.8             |
| Fibrinogen                                                     | FBN           |                                         | 7311        | 1         | 449000000      | 377000000       | 537000000         | 9.7/7.0             | 3.8/2.9             |
| Fibroblast growth factor 23                                    | FGF23         |                                         | 6976        | 5         | 46.2           | 34.15           | 67.3              | 5.5/5.7             | 13.4/14.0           |
| Glyceraldehyde 3-phosphate dehydrogenase                       | GAPDH         |                                         | 7283        | 0         | 71300          | 50500           | 96900             | 19.0/14.2           | 3.7/3.8             |
| Growth differentiation factor 15                               | GDF15         |                                         | 7348        | 0         | 466            | 353             | 661               | 11.9/6.8            | 5.4/5.0             |
| Granule membrane protein 140                                   | GMP140        | Yes                                     | 7332        | 0         | 15800          | 12900           | 19200             | 14.8/12.1           | 4.9/4.4             |
| Glycoprotein V (platelet)                                      | GP5           |                                         | 7324        | 0         | 875            | 737             | 1050              | 15.1/7.6            | 3.9/3.5             |
| Granulin                                                       | GRN           | Yes                                     | 7333        | 0         | 20000          | 17200           | 23300             | 6.4/4.4             | 4.2/1.2             |
| Hemopexin                                                      | Hemopexin     |                                         | 7327        | 0         | 775000000      | 681000000       | 883000000         | 4.7/3.4             | 7.7/5.6             |
| Insulin-like growth factor 1                                   | IGF1          | Yes                                     | 7276        | 1         | 6350           | 4540            | 8550              | 6.8/3.7             | 9.1/5.5             |
| Insulin-like growth factor-binding protein 1                   | IGFBP1        |                                         | 7002        | 5         | 7140           | 3440            | 14300             | 6.9/5.4             | 2.5/2.5             |
| Insulin-like growth factor binding protein 2                   | IGFBP2        |                                         | 7306        | 1         | 9730000        | 6180000         | 14700000          | 8.7/10.2            | 2.8/6.0             |
| Insulin-like growth factor-binding protein 3                   | IGFBP3        |                                         | 7333        | 0         | 224000         | 190000          | 271000            | 15.2/18.0           | 3.9/4.4             |
| Plasma kallikrein**                                            | KLKB1         | Yes                                     | 7343        | 0         | 6460000        | 5470000         | 7630000           | 16.2/24.5           | 10.2/3.2            |
| LDL receptor                                                   | LDLR          | Yes                                     | 7295        | 1         | 137000         | 68400           | 295000            | 3.4/3.9             | 8.9/4.7             |
| Leptin                                                         | Leptin        | Yes                                     | 6824        | 7         | 3610           | 1580            | 8880              | 9.6/3.2             | 15.8/7.0            |
| Leptin receptor                                                | Leptin-R      |                                         | 5673        | 23        | 2010           | 1040            | 3100              | 5.5/6.0             | 10.7/9.1            |
| Lipoprotein(a)                                                 | LPA           |                                         | 7081        | 4         | 57200000       | 19900000        | 187000000         | 15.5/14.0           | 9.8/8.2             |
| Melanoma cell adhesion molecule                                | MCAM          |                                         | 7291        | 1         | 145000         | 125000          | 171000            | 11.1/5.1            | 4.5/3.8             |
| Monocyte chemoattractant molecule 1                            | MCP1          | Yes                                     | 7316        | 1         | 166            | 135             | 202               | 3.3/6.1             | 11.1/13.7           |
| Matrix metalloproteinase 8                                     | MMP8          | Yes                                     | 6343        | 14        | 309            | 155             | 517               | 8.3/5.6             | 16.9/13.9           |
| Matrix metalloproteinase 9                                     | MMP9          | Yes                                     | 7339        | 0         | 46000          | 36100           | 63300             | 8.1/10.0            | 4.7/3.9             |
| Myeloperoxidase                                                | MPO           |                                         | 7348        | 0         | 9550           | 7430            | 12100             | 13.2/9.6            | 3.8/4.4             |
| Myoglobin                                                      | Myoglobin     |                                         | 7333        | 0         | 12800          | 9970            | 16900             | 6.6/6.2             | 6.6/8.0             |
| Neural cell adhesion molecule                                  | NCAM          |                                         | 7326        | 0         | 279000         | 233000          | 333000            | 7.2/4.3             | 2.4/1.6             |
| Notch 1                                                        | Notch1        | Yes                                     | 7323        | 0         | 149            | 118             | 186               | 6.2/5.5             | 2.3/2.3             |
| Neuronal cell adhesion molecule                                | NRCAM         |                                         | 6991        | 5         | 6410           | 2900            | 13800             | 3.4/2.5             | 9.0/4.4             |
| Osteocalcin                                                    | Osteocalcin   |                                         | 7165        | 3         | 2750           | 1770            | 4090              | 5.1/6.3             | 8.8/10.7            |
| Plasminogen activator inhibitor 1                              | PAI1          | Yes                                     | 7331        | 0         | 16500          | 11400           | 23900             | 3.6/4.2             | 10.8/12.3           |
| Peripheral myelin protein 2                                    | PMP2          |                                         | 7299        | 1         | 521            | 322             | 864               | 3.1/4.7             | 5.8/6.6             |
| Serum paraoxonase/arylesterase 1                               | PON1          |                                         | 7336        | 0         | 30100          | 21200           | 42500             | 7.4/7.6             | 4.2/3.9             |
| Pro-platelet basic protein                                     | PPBP          | Yes                                     | 7306        | 1         | 1180000        | 616000          | 2340000           | 6.0/6.4             | 3.0/3.8             |
| Lithostathine-1-alpha                                          | REG1A         |                                         | 7326        | 0         | 85400          | 67000           | 113000            | 7.7/8.8             | 6.9/11.3            |
| Resistin                                                       | Resistin      |                                         | 7299        | 1         | 6480           | 5270            | 7970              | 5.0/4.6             | 11.2/11.0           |
| Serum amyloid A1                                               | SAA1          | Yes                                     | 7169        | 2         | 237000         | 128000          | 449500            | 21.9/23.4           | 13.6/8.5            |
| Stromal cell-derived factor 1                                  | SDF1          |                                         | 7310        | 1         | 344            | 268             | 453               | 15.6/8.4            | 4.8/7.0             |
| Protein Z-dependent protease inhibitor                         | SERPINA10     |                                         | 7327        | 0         | 111000         | 95600           | 127000            | 7.0/6.0             | 3.4/4.7             |
| Interleukin-6 receptor beta                                    | sGP130        | Yes                                     | 7345        | 0         | 58700          | 52100           | 66100             | 9.1/3.9             | 3.0/3.0             |
| Intercellular adhesion molecule 1                              | siCAM1        | Yes                                     | 7321        | 1         | 18700          | 16000           | 22300             | 11.2/9.3            | 4.5/4.5             |
| Receptor for advanced glycation endproducts                    | sRAGE         | Yes                                     | 7297        | 1         | 3440           | 2750            | 4240              | 5.6/4.0             | 14.5/15.0           |
| Tissue inhibitor of metalloproteinases 1                       | TIMP1         | Yes                                     | 7335        | 0         | 31400          | 27700           | 35900             | 13.2/8.5            | 4.3/5.4             |
| TSC22D3 domain family member 3                                 | TSC22D3       |                                         | 7088        | 4         | 1589           | 1266            | 1920              | 9.3/15.9            | 9.0/12.2            |
| Uncarboxylated MGP                                             | UCMGP         |                                         | 7310        | 0         | 45500          | 33300           | 61700             | 17.8/17.8           | 11.5/10.1           |
| Vascular endothelial growth factor                             | VEGF          |                                         | 6028        | 18        | 21.9           | 12.7            | 37                | 4.3/6.0             | 14.7/14.0           |

**Supplementary Table 1: Protein Biomarker Assay Characteristics and Inflammatory Dataset**

\*Proteins were categorized as inflammatory using the Gene Ontology AmiGo2 and QIAGEN Ingenuity Pathway Analysis tools and their inflammatory related terms.

\*\*These proteins could not be clearly categorized as pro-inflammatory or anti-inflammatory and were excluded when generating the AIS.

| Protein Full Name                           | Abbreviation | Common Gene ID | Uniprot KB ID | Gene Ontology Term <sup>1</sup> | Ingenuity Pathway Analysis Term <sup>2</sup>                       |
|---------------------------------------------|--------------|----------------|---------------|---------------------------------|--------------------------------------------------------------------|
| Adrenomedullin                              | ADM          | ADM            | P35318        | Inflammatory response           | Inflammation, Inflammatory response, Chronic inflammatory disorder |
| Alpha-1 acid glycoprotein                   | AGP1         | ORM1           | P02763        | Inflammatory response           | Inflammatory response                                              |
| Apolipoprotein A-1                          | APOA1        | APOA1          | P02647        | Inflammatory response           | Inflammation, Inflammatory response, Chronic inflammatory disorder |
| Monocyte differentiation antigen CD14       | CD14         | CD14           | P08571        | Inflammatory response           | Inflammation, Inflammatory response                                |
| Cluster of differentiation 163              | CD163        | CD163          | Q86VB7        | Inflammatory response           | Inflammatory response                                              |
| Soluble CD40 ligand                         | CD40L        | CD40LG         | P29965        | Inflammatory response           | Inflammation, Inflammatory response, Chronic inflammatory disorder |
| CD5 antigen-like                            | CD5L         | CD5L           | O43866        | Inflammatory response           | Inflammation                                                       |
| Clusterin                                   | Clusterin    | CLU            | P10909        | Inflammatory response           | Inflammation, Chronic inflammatory disorder                        |
| C-Reactive Protein                          | CRP          | CRP            | P02741        | Inflammatory response           | Inflammation, Inflammatory response, Chronic inflammatory disorder |
| Granule membrane protein 140                | GMP140       | SELP           | P16109        | Inflammatory response           | Inflammation, Inflammatory response, Chronic inflammatory disorder |
| Granulin                                    | GRN          | GRN            | P28799        | Inflammatory response           | Inflammation, Inflammatory response, Chronic inflammatory disorder |
| Insulin-like growth factor 1                | IGF1         | IGF1           | P05019        | Inflammatory response           | Inflammation, Inflammatory response, Chronic inflammatory disorder |
| Plasma kallikrein**                         | KLKB1        | KLKB1          | P03952        | Inflammatory response           | Inflammation, Inflammatory response                                |
| LDL receptor                                | LDLR         | LDLR           | P01130        | Inflammatory response           | Inflammation, Inflammatory response                                |
| Leptin                                      | Leptin       | LEP            | P41159        | Inflammatory response           | Inflammation, Inflammatory response, Chronic inflammatory disorder |
| Monocyte chemoattractant molecule 1         | MCP1         | CCL2           | P13500        | Inflammatory response           | Inflammation, Inflammatory response, Chronic inflammatory disorder |
| Matrix metalloproteinase 8                  | MMP8         | MMP8           | P22894        | Inflammatory response           | Inflammation, Inflammatory response                                |
| Matrix metalloproteinase 9                  | MMP9         | MMP9           | P14780        | Inflammatory response           | Inflammation, Inflammatory response, Chronic inflammatory disorder |
| Notch 1                                     | Notch1       | NOTCH1         | P46531        | Inflammatory response           | Inflammation, Inflammatory response                                |
| Plasminogen activator inhibitor 1           | PAI1         | SERPINE1       | P05121        | Inflammatory response           | Inflammation, Inflammatory response, Chronic inflammatory disorder |
| Pro-platelet basic protein                  | PPBP         | PPBP           | P02775        | Inflammatory response           | Inflammatory response                                              |
| Serum amyloid A1                            | SAA1         | SAA1           | P0DJJ8        | Inflammatory response           | Inflammatory response, Chronic inflammatory disorder               |
| Interleukin-6 receptor beta                 | sGP130       | IL6ST          | P40189        | Inflammatory response           | Inflammation, Inflammatory response, Chronic inflammatory disorder |
| Intercellular adhesion molecule 1           | sICAM1       | ICAM1          | P05362        | Inflammatory response           | Inflammation, Inflammatory response, Chronic inflammatory disorder |
| Receptor for advanced glycation endproducts | sRAGE        | AGER           | Q15109        | Inflammatory response           | Inflammation, Inflammatory response, Chronic inflammatory disorder |
| Tissue inhibitor of metalloproteinases 1    | TIMP1        | TIMP1          | P01033        | Inflammatory response           | Inflammation, Chronic inflammatory disorder                        |

**Supplementary Table 2: Inflammatory Protein Identification**

<sup>1</sup>Using the Gene Ontology AmiGO2 tool, inflammatory terms in the "GO class (direct)" category were used to identify proteins with inflammatory annotations.

<sup>2</sup>Following an Ingenuity Pathway Analysis network overlay disease and functions analysis, inflammatory terms in the "Functions" category were used to identify proteins with inflammatory annotations.



## AIS Score Breakdown

| <b>Protein</b> | <b>AIS = -20.28</b> | <b>AIS = + 20.28</b> |
|----------------|---------------------|----------------------|
| SAA1           | 0.4468              | 0.9987               |
| AGP1           | -0.5481             | -0.7737              |
| Leptin         | -1.8849             | 2.8137               |
| ADM            | -1.4840             | 1.0643               |
| PAI1           | -2.1465             | 1.6066               |
| sICAM1         | -0.9879             | -0.4547              |
| CD14           | 0.1729              | 0.2308               |
| TIMP1          | -0.1786             | 1.7700               |
| GRN            | -0.5705             | 1.0409               |
| CD5L           | 1.0163              | 2.3500               |
| GMP140         | -1.6678             | 1.5486               |
| MCP1           | -1.8349             | 0.7506               |
| MMP8           | 0.3314              | 1.8124               |
| CD163          | -1.6248             | 0.6313               |
| CD40L          | -0.0831             | -1.0924              |
| MMP9           | -0.3717             | 2.0538               |
| PPBP           | -1.5059             | -0.7029              |
| LDLR           | -1.2219             | 0.4540               |
| Notch1         | -0.4169             | 0.3042               |
| sGP130         | -0.8122             | -0.1549              |
| APOA1          | -1.6908             | 0.2775               |
| IGF1           | -0.8255             | 1.7749               |
| sRAGE          | -0.9892             | 1.3561               |
| CRP            | -1.4047             | 0.6272               |

### **Supplementary Table 4: Aggregate Inflammatory Score Breakdown**

The rank normalized values of the 24 inflammatory proteins used to generate Aggregate Inflammatory Scores are presented for two participants: AIS = -20.28 and +20.28. In accordance with the previously detailed modification of anti-inflammatory protein values, the values of sRAGE, IGF1, and APOA1 counter those of pro-inflammatory proteins. As such, high raw values for an anti-inflammatory protein are reflected as a negative value to demonstrate its anti-inflammatory effect. Reflecting the summation of pro-inflammatory and anti-inflammatory protein values, the scores illustrate differences in the degree of systemic inflammation between the two participants. The participant in a more pro-inflammatory state (AIS = +20.28) possesses higher levels of the flagship pro-inflammatory markers CRP and MCP1 and lower values of the flagship anti-inflammatory markers sRAGE, IGF1, and APOA1.

## PCA Score Breakdown- PC1

| <b>Proteins</b> | <b>Loadings</b> |
|-----------------|-----------------|
| TIMP1           | 224.71689       |
| ADM             | 214.23554       |
| GMP140          | 85.48873        |
| CD14            | 80.80614        |
| APOA1           | 26.80809        |
| AGP1            | 4.06615         |
| KLKB1           | 1.11161         |
| MMP9            | -1.98561        |
| sGP130          | -4.08385        |
| Clusterin       | -7.49015        |
| SAA1            | -15.39233       |
| sRAGE           | -24.88182       |
| LDLR            | -34.75381       |
| CD5L            | -35.59362       |
| CRP             | -36.61915       |
| GRN             | -37.34057       |
| sICAM1          | -37.56678       |
| PPBP            | -38.02289       |
| PAI1            | -38.25375       |
| MCP1            | -39.86615       |
| Notch1          | -41.27009       |
| CD163           | -45.00174       |
| Leptin          | -48.13498       |
| IGF1            | -49.30999       |
| CD40L           | -50.60084       |
| MMP8            | -51.06503       |

### **Supplementary Table 5: Principal Component Analysis PC1 Loadings**

PCA was used to capture factors within the scaled, imputed dataset of 26 inflammatory proteins. The first principal component (PC1) captured the largest degree of variance within the protein dataset (89.7%) and was selected to construct the PCA inflammatory score. The PC1 loadings for the individual proteins are listed above.

| Risk Factor               | AIS                         |                |          | PCA Score                      |                |          |
|---------------------------|-----------------------------|----------------|----------|--------------------------------|----------------|----------|
|                           | Beta<br>(95% CI)            | Standard Error | P Value  | Beta<br>(95% CI)               | Standard Error | P Value  |
| Triglycerides (mg/dL)     | 0.006<br>(0.006 - 0.006)    | > 0.000        | 4.12E-69 | > 0.000<br>(> 0.000 - > 0.000) | > 0.000        | 4.34E-14 |
| Total Cholesterol (mg/dL) | 0.184<br>(0.076 - 0.292)    | 0.055          | 8.93E-04 | -0.01<br>(-0.014 - -0.006)     | 0.002          | 1.52E-06 |
| HDL-Cholesterol (mg/dL)   | -0.371<br>(-0.414 - -0.328) | 0.022          | 3.66E-61 | -0.004<br>(-0.006 - -0.002)    | 0.001          | 1.06E-05 |
| Glucose (mg/dL)           | 0.118<br>(0.073 - 0.163)    | 0.023          | 1.92E-07 | 0.002<br>(0.000 - 0.004)       | 0.001          | 9.50E-03 |
| SBP (mmHg)                | 0.019<br>(-0.010 - 0.048)   | 0.015          | 1.86E-01 | -0.002<br>(-0.004 - 0.000)     | 0.001          | 1.81E-05 |
| DBP (mmHg)                | 0.197<br>(0.158 - 0.236)    | 0.020          | 4.51E-22 | 0.004<br>(0.002 - 0.006)       | 0.001          | 3.48E-07 |

Model: Risk Factor = Inflammatory Score + Age + Sex + Cohort + BMI

**Supplementary Table 6: Medication exclusion cross-sectional analysis**

Two regression models were used utilizing either the AIS or the PCA score as the independent variable and the continuous risk factors as the dependent variable with adjustments for age, sex, cohort, and BMI. In the analysis of each risk factor, participants using medications that affect the respective risk factor were excluded: lipid-lowering, blood pressure, or diabetic medication. Only participants with fasting measurements were included in triglycerides, total cholesterol, HDL, and glucose analyses. Triglyceride levels were log transformed ( $\log_{10}$ ) in order to obtain normality. Bonferroni corrected p value = 3.33E-03 (0.05/15).

Abbreviations: SBP, Systolic Blood Pressure; DBP, Diastolic Blood Pressure

A

| Risk Factor                | Discovery <sup>1</sup>        |                |          | Validation <sup>2</sup>       |                |          |
|----------------------------|-------------------------------|----------------|----------|-------------------------------|----------------|----------|
|                            | Beta <sup>3</sup><br>(95% CI) | Standard Error | P Value  | Beta <sup>3</sup><br>(95% CI) | Standard Error | P Value  |
| Age (years)                | 0.26<br>(0.22 - 0.30)         | 0.02           | 9.77E-54 | 0.26<br>(0.22 - 0.30)         | 0.02           | 4.29E-55 |
| Sex (Male)                 | 2.55<br>(1.96 - 3.14)         | 0.30           | 2.15E-17 | 1.97<br>(1.38 - 2.56)         | 0.30           | 3.23E-11 |
| Never vs. Current Smokers  | 3.35<br>(2.51 - 4.19)         | 0.43           | 1.74E-14 | 3.17<br>(2.33 - 4.01)         | 0.43           | 2.78E-13 |
| Never vs. Former Smokers   | 0.33<br>(-0.34 - 1.00)        | 0.34           | 3.42E-01 | 0.15<br>(-0.54 - 0.84)        | 0.35           | 6.72E-01 |
| Former vs. Current Smokers | 3.21<br>(2.31 - 4.11)         | 0.46           | 4.24E-12 | 3.19<br>(2.27 - 4.11)         | 0.47           | 2.12E-11 |

B

| Risk Factor               | Discovery <sup>1</sup>        |                |           | Validation <sup>2</sup>      |                |           |
|---------------------------|-------------------------------|----------------|-----------|------------------------------|----------------|-----------|
|                           | Beta <sup>4</sup><br>(95% CI) | Standard Error | P Value   | Beta <sup>4</sup><br>(95%CI) | Standard Error | P Value   |
| Triglycerides (mg/dL)     | 0.009<br>(0.009 - 0.009)      | > 0.000        | 4.52E-93  | 0.009<br>(0.009 - 0.009)     | > 0.000        | 8.47E-101 |
| Total Cholesterol (mg/dL) | 0.364<br>(0.219 - 0.509)      | 0.074          | 8.39E-07  | 0.545<br>(0.400 - 0.690)     | 0.074          | 1.61E-13  |
| HDL-Cholesterol (mg/dL)   | -0.550<br>(-0.601 - -0.499)   | 0.026          | 1.40E-95  | -0.530<br>(-0.583 - -0.477)  | 0.027          | 5.24E-79  |
| Glucose (mg/dL)           | 0.529<br>(0.447 - 0.611)      | 0.042          | 3.75E-35  | 0.689<br>(0.601 - 0.777)     | 0.045          | 1.81E-50  |
| SBP (mmHg)                | 0.402<br>(0.341 - 0.463)      | 0.031          | 1.60E-38  | 0.453<br>(0.392 - 0.514)     | 0.031          | 9.85E-46  |
| DBP (mmHg)                | 0.206<br>(0.169 - 0.243)      | 0.019          | 3.88E-27  | 0.217<br>(0.180 - 0.254)     | 0.019          | 6.65E-30  |
| BMI (kg/m <sup>2</sup> )  | 0.261<br>(0.243 - 0.279)      | 0.009          | 4.26E-173 | 0.272<br>(0.254 - 0.290)     | 0.009          | 4.88E-179 |

C

| Outcome      | Discovery <sup>1</sup> |               |          | Validation <sup>2</sup> |               |          |
|--------------|------------------------|---------------|----------|-------------------------|---------------|----------|
|              | OR <sup>5</sup>        | 95% CI        | P Value  | OR <sup>5</sup>         | 95% CI        | P Value  |
| Hypertension | 1.59                   | (1.47 - 1.72) | 4.72E-29 | 1.76                    | (1.62 - 1.91) | 3.69E-40 |
| Diabetes     | 2.19                   | (1.88 - 2.56) | 3.37E-23 | 2.60                    | (2.22 - 3.05) | 4.33E-32 |
| Obesity      | 2.63                   | (2.39 - 2.90) | 1.76E-85 | 2.79                    | (2.53 - 3.08) | 2.65E-92 |

Note: Replication threshold:  $p < 3.33 \times 10^{-3} = 0.05/15$  traits

<sup>1</sup>Total study population of 7,287 participants split by pedigree (n=3,645)

<sup>2</sup>Total study population of 7,287 participants split by pedigree (n=3,642)

<sup>3</sup>Model: AIS = Age/Sex/Smoking Status + Age + Sex + Cohort

<sup>4</sup>Model: Risk Factor = AIS + Age + Sex + Cohort

<sup>5</sup>Model: Outcome = AIS + Age + Sex + Cohort

#### Supplementary Table 7: AIS: Internal Validation of Cross-sectional Associations with Cardiometabolic Risk Factors

Abbreviations: SBP, Systolic Blood Pressure; DBP, Diastolic Blood Pressure

A

| Risk Factor                | Discovery <sup>1</sup>   |                |           | Validation <sup>2</sup>  |                |          |
|----------------------------|--------------------------|----------------|-----------|--------------------------|----------------|----------|
|                            | Beta <sup>3</sup>        | Standard Error | P Value   | Beta <sup>3</sup>        | Standard Error | P Value  |
| Age (years)                | 6.74<br>(6.13 - 7.35)    | 0.31           | 1.14E-100 | 6.30<br>(5.71 - 6.89)    | 0.30           | 1.74E-90 |
| Sex (Male)                 | 3.00<br>(-7.88 - 13.88)  | 5.55           | 5.89E-01  | -4.69<br>(-15.69 - 6.31) | 5.61           | 4.03E-01 |
| Never vs. Current Smokers  | 26.40<br>(11.05 - 41.75) | 7.83           | 7.53E-04  | 32.75<br>(17.83 - 47.67) | 7.61           | 1.76E-05 |
| Never vs. Former Smokers   | -4.87<br>(-17.51 - 7.77) | 6.45           | 4.50E-01  | 5.56<br>(-7.30 - 18.42)  | 6.56           | 3.97E-01 |
| Former vs. Current Smokers | 35.30<br>(17.84 - 52.76) | 8.91           | 7.67E-05  | 33.96<br>(14.83 - 53.09) | 9.76           | 5.11E-04 |

B

| Risk Factor               | Discovery <sup>1</sup>          |                |          | Validation <sup>2</sup>         |                |          |
|---------------------------|---------------------------------|----------------|----------|---------------------------------|----------------|----------|
|                           | Beta <sup>4</sup>               | Standard Error | P Value  | Beta <sup>4</sup>               | Standard Error | P Value  |
| Triglycerides (mg/dL)     | > 0.000<br>( > 0.000 - > 0.000) | > 0.000        | 5.98E-19 | > 0.000<br>( > 0.000 - > 0.000) | > 0.000        | 1.20E-32 |
| Total Cholesterol (mg/dL) | -0.011<br>(-0.019 - -0.003)     | 0.004          | 4.48E-03 | 0.002<br>(-0.006 - 0.010)       | 0.004          | 5.30E-01 |
| HDL-Cholesterol (mg/dL)   | -0.013<br>(-0.015 - -0.011)     | 0.001          | 1.10E-19 | -0.012<br>(-0.016 - -0.008)     | 0.002          | 2.42E-14 |
| Glucose (mg/dL)           | 0.020<br>(0.016 - 0.024)        | 0.002          | 3.46E-17 | 0.021<br>(0.017 - 0.025)        | 0.002          | 1.00E-17 |
| SBP (mmHg)                | 0.015<br>(0.011 - 0.019)        | 0.002          | 2.73E-19 | 0.019<br>(0.015 - 0.023)        | 0.002          | 3.95E-30 |
| DBP (mmHg)                | 0.002<br>(0.000 - 0.004)        | 0.001          | 7.60E-02 | 0.006<br>(0.004 - 0.008)        | 0.001          | 4.07E-08 |
| BMI (kg/m <sup>2</sup> )  | 0.008<br>(0.006 - 0.010)        | 0.001          | 6.80E-48 | 0.008<br>(0.006 - 0.010)        | 0.001          | 5.95E-57 |

C

| Outcome      | Discovery <sup>1</sup> |               |          | Validation <sup>2</sup> |               |          |
|--------------|------------------------|---------------|----------|-------------------------|---------------|----------|
|              | OR <sup>5</sup>        | 95% CI        | P Value  | OR <sup>5</sup>         | 95% CI        | P Value  |
| Hypertension | 1.36                   | (1.24 - 1.49) | 4.26E-11 | 1.46                    | (1.33 - 1.60) | 3.90E-16 |
| Diabetes     | 1.61                   | (1.40 - 1.84) | 8.15E-12 | 1.63                    | (1.43 - 1.86) | 1.21E-13 |
| Obesity      | 1.63                   | (1.49 - 1.79) | 5.73E-26 | 1.77                    | (1.62 - 1.95) | 6.98E-34 |

Note: Replication threshold:  $p < 3.33 \times 10^{-3} = 0.05/15$  traits

<sup>1</sup>Total study population of 7,287 participants split by pedigree (n=3,645)

<sup>2</sup>Total study population of 7,287 participants split by pedigree (n=3,642)

<sup>3</sup> Model: PCA Score = Age/Sex/Smoking Status + Age + Sex + Cohort

<sup>4</sup> Model: Risk Factor = PCA Score + Age + Sex + Cohort

<sup>5</sup> Model: Outcome = PCA Score + Age + Sex + Cohort

**Supplementary Table 8: Principal Component Analysis Score: Internal Validation of Cross-sectional Associations with Cardiometabolic Risk Factors**

Abbreviations: SBP, Systolic Blood Pressure; DBP, Diastolic Blood Pressure



| Outcome                | AIS  |               |          | PCA Score |               |          |
|------------------------|------|---------------|----------|-----------|---------------|----------|
|                        | OR   | 95% CI        | P Value  | OR        | 95% CI        | P Value  |
| New Onset Hypertension | 1.20 | (1.08 - 1.33) | 9.90E-04 | 1.17      | (1.03 - 1.32) | 1.33E-02 |
| New Onset Diabetes     | 1.09 | (0.93 - 1.28) | 2.96E-01 | 0.94      | (0.81 - 1.10) | 4.51E-01 |

Note: Outcome = Inflammatory Score + Baseline Age + Sex + Cohort + Years to Follow-up Exam  
+ Relevant Risk Factor (baseline SBP and DBP for hypertension, baseline glucose for diabetes, and  
baseline BMI for obesity) + Baseline BMI

**Supplementary Table 9: Logistic Regression: Prospective Associations of PCA and AIS Scores with New-onset Hypertension, Diabetes, and Obesity with BMI Adjustments**

Logistic regression models were used to explore the prospective associations of the AIS and PCA score with new-onset hypertension and diabetes with an additional adjustment for baseline BMI. There were 948 new-onset cases of hypertension of the 3,220 participants at risk with follow-up events data and 306 new-onset cases of diabetes of the 5,709 participants at risk with follow-up events data. Odds ratios (OR) are presented per 1-SD increase in the respective inflammatory score.

| <b>Outcome</b>         | <b>OR</b> | <b>95% CI</b> | <b>P Value</b> |
|------------------------|-----------|---------------|----------------|
| New Onset Hypertension | 1.22      | (1.09 - 1.36) | 6.23E-04       |
| New Onset Diabetes     | 1.04      | (0.88 - 1.23) | 6.64E-01       |

Model: Outcome = Inflammatory Score + Baseline Age + Sex + Cohort + Years to Follow-up Exam + Relevant Risk Factor (baseline SBP and DBP for hypertension and baseline glucose for diabetes) + Baseline BMI + Baseline hsCRP

**Supplementary Table 10: AIS and CRP Sensitivity Analyses**

To investigate the independence of the AIS from the predictive capabilities of CRP, the prospective analysis of the AIS and new-onset hypertension, diabetes, and obesity at the follow-up exam was repeated but with the additional adjustment of baseline BMI and baseline hsCRP levels. Odds ratios (OR) are presented per 1-SD increase in the AIS.

| <b>Outcome</b>         | <b>OR</b> | <b>95% CI</b> | <b>P Value</b> |
|------------------------|-----------|---------------|----------------|
| New Onset Hypertension | 1.18      | (1.04 - 1.33) | 9.50E-03       |
| New Onset Diabetes     | 0.94      | (0.80 - 1.09) | 4.23E-01       |

Model: Outcome = Inflammatory Score + Baseline Age + Sex + Cohort + Years to Follow-up Exam + Relevant Risk Factor (baseline SBP and DBP for hypertension and baseline glucose for diabetes) + Baseline BMI + Baseline hsCRP

**Supplementary Table 11: PCA Score and CRP Sensitivity Analyses**

To investigate the independence of the PCA score from the predictive capabilities of CRP, the prospective analysis of the PCA score and new-onset hypertension and diabetes at the follow-up exam was repeated but with the additional adjustment of baseline BMI and baseline hsCRP levels. Odds ratios (OR) are presented per 1-SD increase in the PCA score.

| Primary Outcomes <sup>2</sup>         | AIS             |             |          | PCA Score       |             |            | hsCRP <sup>1</sup> |             |          |
|---------------------------------------|-----------------|-------------|----------|-----------------|-------------|------------|--------------------|-------------|----------|
|                                       | HR <sup>4</sup> | 95% CI      | P Value  | HR <sup>4</sup> | 95% CI      | P Value    | HR <sup>4</sup>    | 95% CI      | P Value  |
| New-onset CVD                         | 1.25            | 1.14 - 1.37 | 1.21E-06 | 1.22            | 1.13 - 1.33 | 8.81E-07   | 1.12               | 1.06 - 1.19 | 1.21E-04 |
| All-cause Mortality                   | 1.32            | 1.23 - 1.42 | 1.20E-14 | 1.40            | 1.31 - 1.49 | < 1.00E-20 | 1.06               | 1.02 - 1.09 | 6.82E-04 |
| <b>Secondary Outcomes<sup>3</sup></b> |                 |             |          |                 |             |            |                    |             |          |
| Coronary Heart Disease                | 1.09            | 0.95 - 1.25 | 2.20E-01 | < 1.00          | 0.87 - 1.14 | 9.67E-01   | 1.11               | 1.02 - 1.22 | 1.61E-02 |
| Heart Failure                         | 1.54            | 1.36 - 1.74 | 1.83E-11 | 1.52            | 1.37 - 1.69 | 2.30E-15   | 1.09               | 1.04 - 1.14 | 7.63E-05 |
| Atherothrombotic Stroke               | 1.22            | 0.98 - 1.52 | 7.74E-02 | 1.26            | 1.04 - 1.52 | 1.81E-02   | 0.93               | 0.72 - 1.19 | 5.87E-01 |
| Revascularization Procedure           | 1.23            | 1.09 - 1.40 | 1.11E-03 | 1.14            | 1.02 - 1.28 | 2.60E-02   | 1.08               | 1.03 - 1.13 | 6.83E-04 |
| CVD Death                             | 1.42            | 1.22 - 1.64 | 3.43E-06 | 1.61            | 1.42 - 1.81 | 8.48E-15   | 1.09               | 1.03 - 1.15 | 1.84E-03 |

<sup>1</sup>high sensitivity CRP (mg/L)

<sup>2</sup>All-cause Mortality: 1070 events / 3488 at risk; New-onset CVD: 627 events / 3101 at risk

<sup>3</sup>Coronary Heart Disease: 288 events / 3188 at risk; Heart Failure: 319 events / 3465 at risk; Atherothrombotic Stroke: 109 events / 3453 at risk; Revascularization Procedure: 332 events / 3494 at risk; CVD Death: 249 events / 3453 at risk

<sup>4</sup>Hazard ratios are presented per 1-SD increase in the respective inflammatory score

**Supplementary Table 12: Proportional Hazards Regression: Associations of AIS, PCA Score, and high sensitivity CRP with New-onset All-cause Mortality and Cardiovascular Disease**

| <b>Risk Factor*</b>       | <b>Beta</b>            | <b>Standard Error</b> | <b>P Value</b> |
|---------------------------|------------------------|-----------------------|----------------|
| Age (years)               | 0.03<br>(0.03 - 0.03)  | < 0.01                | 2.22E-27       |
| Sex                       | 0.41<br>(0.29 - 0.53)  | 0.06                  | 2.50E-13       |
| Never vs Current Smokers  | 1.22<br>(1.06 - 1.38)  | 0.08                  | 8.64E-53       |
| Never vs Former Smokers   | 0.05<br>(-0.07 - 0.17) | 0.06                  | 4.15E-01       |
| Former vs Current Smokers | 1.27<br>(1.09 - 1.45)  | 0.09                  | 9.22E-48       |

| <b>Risk Factor**</b>      | <b>Beta</b>              | <b>Standard Error</b> | <b>P Value</b> |
|---------------------------|--------------------------|-----------------------|----------------|
| Triglycerides (mg/dL)     | 0.02<br>(0.02 - 0.02)    | < 0.01                | 9.46E-82       |
| Total Cholesterol (mg/dL) | -0.22<br>(-0.61 - 0.17)  | 0.20                  | 2.62E-01       |
| HDL (mg/dL)               | -1.92<br>(-2.06 - -1.78) | 0.07                  | 1.22E-163      |
| Glucose (mg/dL)           | 0.91<br>(0.67 - 1.15)    | 0.12                  | 1.16E-14       |
| SBP (mmHg)                | 0.57<br>(0.41 - 0.73)    | 0.08                  | 4.19E-12       |
| DBP (mmHg)                | 0.09<br>(-0.01 - 0.19)   | 0.05                  | 6.41E-02       |

| <b>Outcome***</b>      | <b>OR</b> | <b>95% CI</b> | <b>P Value</b> |
|------------------------|-----------|---------------|----------------|
| New Onset Hypertension | 1.32      | (1.20 - 1.45) | 4.74E-09       |
| New Onset Diabetes     | 1.35      | (1.17 - 1.55) | 3.01E-05       |
| New Onset Obesity      | < 1.00    | (0.87 - 1.14) | 9.40E-01       |

\*Cross sectional analyses: Model 2 (Pathway AIS = Risk Factor + Age + Sex + Cohort + BMI)

\*\*Cross sectional analyses: Model 2 (Risk Factor = Pathway AIS + Age + Sex + Cohort + BMI)

\*\*\*Prospective analyses: Model 2 (Outcome = Pathway AIS + Baseline Age + Sex + Cohort + Years to Follow-up Exam + Relevant Risk Factor (baseline blood pressure, glucose, or BMI))

**Supplementary Table 13: Complement System Pathway AIS Associations with Cardiometabolic Risk Factors and New Onset of Disease**

Abbreviations: SBP, Systolic Blood Pressure; DBP, Diastolic Blood Pressure

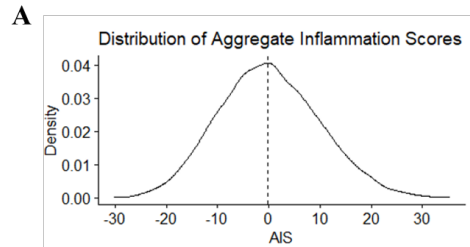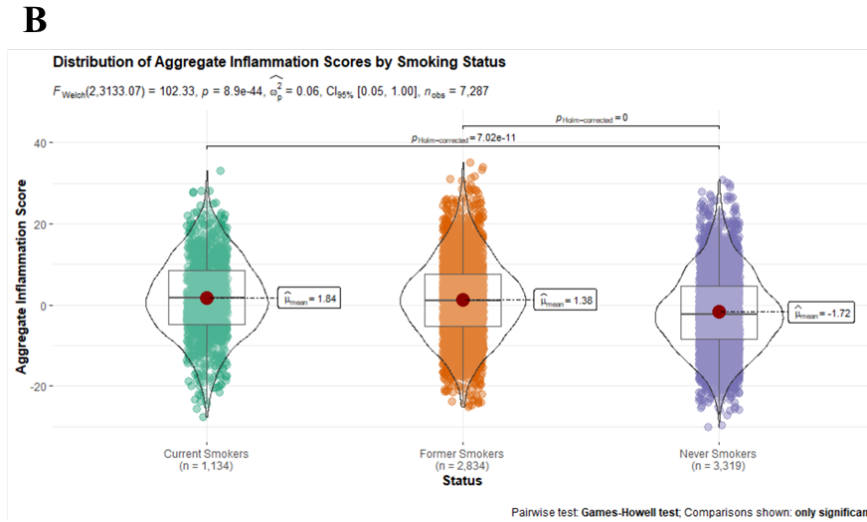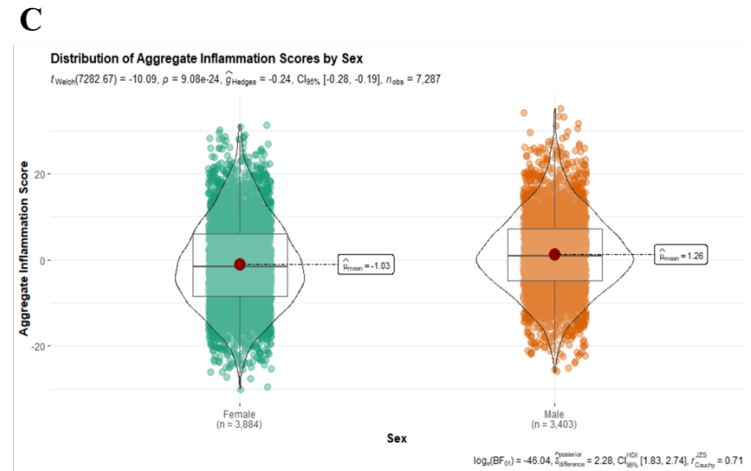

**Supplementary Figure 1: Distribution of Aggregate Inflammation Scores (AIS) in the study population.**

(A) Density plot of AIS for the 7,287 participants. The dashed vertical line denotes the median AIS (-0.270) in the total population. (B) Boxplots comparing the distributions of the AIS by smoking status (current smokers, former smokers, and never smokers). Statistically significant differences in AIS were observed between current and never smokers and between former and never smokers. Current smokers had the highest mean AIS. (C) Boxplots comparing the distributions of the AIS by sex. A statistically significant difference in mean AIS was observed between males and females, with males having greater scores.

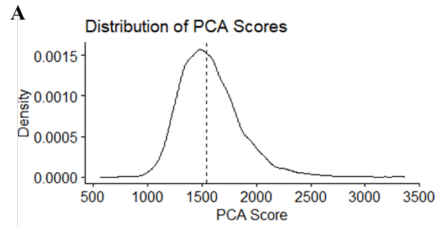

**B**

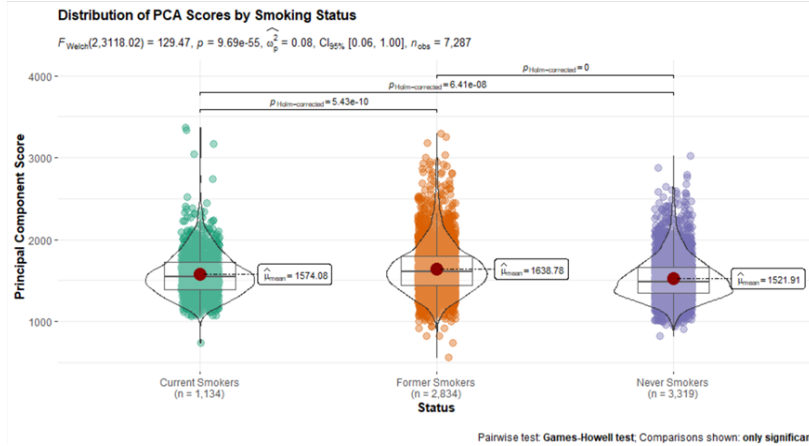

**C**

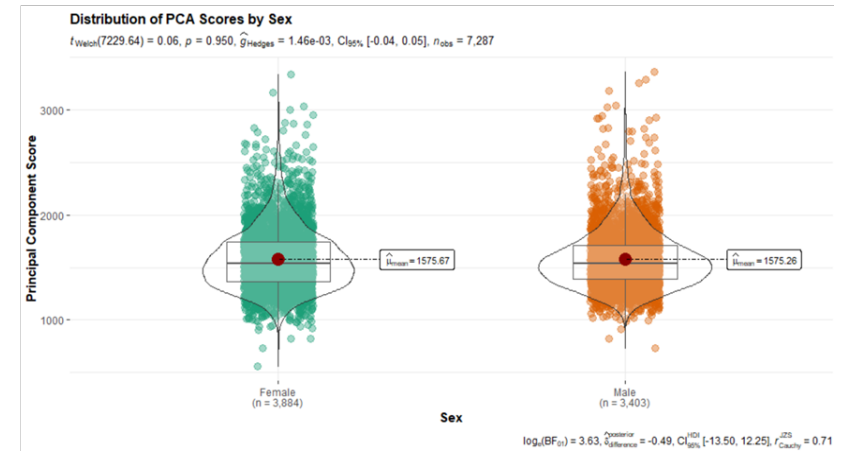

**Supplementary Figure 2: Distribution of Principal Component Analysis (PCA) scores in the study population.**

(A) Density plot of PCA scores for the 7,287 participants. The dashed vertical line denotes the median PCA score (1538.931) in the total population. (B) Boxplots comparing the distributions of the PCA scores by smoking status (current smokers, former smokers, and never smokers). Statistically significant differences in PCA scores were observed between all smoking groups, with current smokers having the highest mean PCA scores. (C) Boxplots comparing the distributions of the PCA score by sex. No statistically significant difference in PCA scores were observed between males and females.

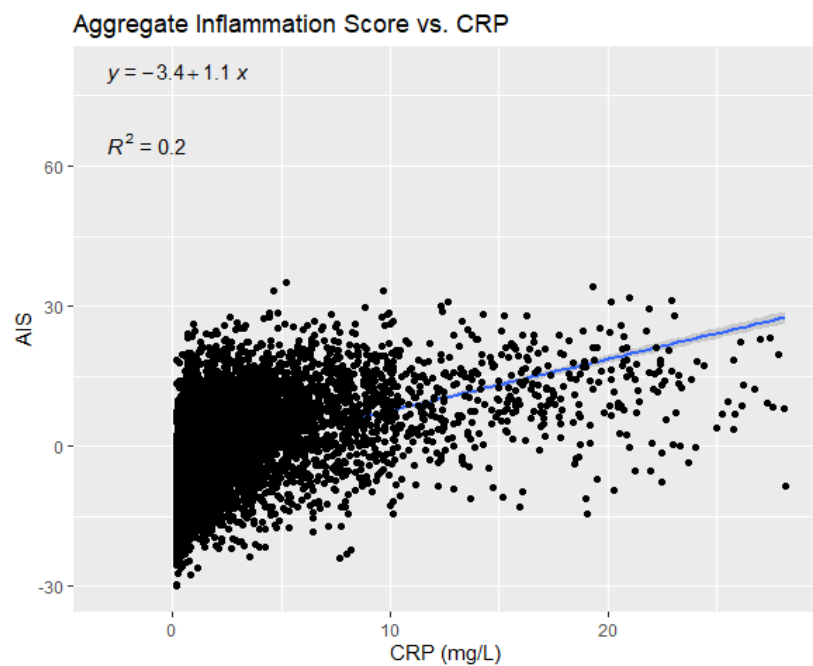

**Supplementary Figure 3: Correlations between AIS and CRP**

The relationship between participant AIS and their CRP levels was explored. The high sensitivity CRP (hsCRP) levels were measured at baseline using a different protein measurement assay than the CRP data that was used to contrast the inflammatory scores. The Pearson coefficient of correlation between the PCA scores and hsCRP levels demonstrated a moderate correlation (0.45). Linear regression analyses demonstrated a moderate correlation between the AIS and hsCRP levels.



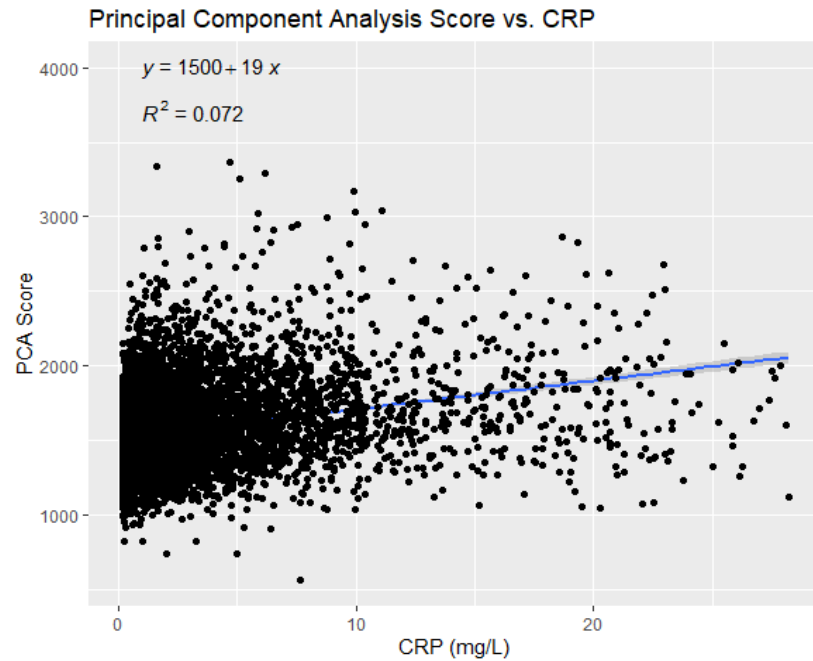

**Supplementary Figure 4: Correlations between PCA Score and CRP**

The relationship between participant PCA scores and their CRP levels was explored. The high sensitivity CRP (hsCRP) levels were measured at baseline using a different protein measurement assay than the CRP data that was used to contrast the inflammatory scores. The Pearson coefficient of correlation between the PCA scores and hsCRP levels demonstrated a moderately weak correlation (0.27). Linear regression analyses demonstrated a moderate correlation between the PCA score and hsCRP levels.
